# Supplementary material
Source: Research Square preprint supplement (doi:10.21203/rs.3.rs-9878910/v1)
Supplement: Supplementary file 1 [file af00227f9f5588f0d7aa912f.docx]

**S1 MPs in the original road surface sediments from three different functional areas**

**S2 MPs types in original road surface sediments from different functional areas**

**S3 Variation characteristics of MPs degradation with humidity in road surface sediments under UV irradiation (a) and high temperature exposure (b)**

**S4 Degradation kinetic rate constant of MPs and their corresponding mass change determination parameters in road surface sediments**

Table 1 Traffic area (site 1)

| Condition | Pseudo-first-order kinetic constant  （1/h）  *R2* | | Pseudo-second-order kinetic constant  1/（g·h）  *R2* | |
| --- | --- | --- | --- | --- |
| *k1*  （1/h） | *R2* | *k2*  1/（g·h） | *R2* |
| UV irradiation at 30 W/m2 | 0.1008±0.0064 | 0.9722 | 7.3103±0.4119 | 0.9783 |
| High temperature at 65 ℃ | 0.1148±0.0056 | 0.9838 | 8.7165±0.3971 | 0.9857 |
| The combined action at 65 ℃+30 W/m2 | 0.1407±0.0040 | 0.9944 | 10.9586±0.4414 | 0.9888 |

Table 2 Cultural and educational area (site 2)

| Condition | Pseudo-first-order kinetic constant  （1/h）  *R2* | | Pseudo-second-order kinetic constant  1/（g·h）  *R2* | |
| --- | --- | --- | --- | --- |
| *k1*  （1/h） | *R2* | *k2*  1/（g·h） | *R2* |
| UV irradiation at 30 W/m2 | 0.0368±0.0029 | 0.9588 | 0.9249±0.0682 | 0.9634 |
| High temperature at 65 ℃ | 0.1182±0.0088 | 0.9629 | 3.5820±0.2092 | 0.9767 |
| The combined action at 65 ℃+30 W/m2 | 0.1811±0.0248 | 0.8843 | 6.2244±0.6703 | 0.9249 |

Table 3 Commercial area (site 3)

| Condition | Pseudo-first-order kinetic constant  （1/h）  *R2* | | Pseudo-second-order kinetic constant  1/（g·h）  *R2* | |
| --- | --- | --- | --- | --- |
| *k1*  （1/h） | *R2* | *k2*  1/（g·h） | *R2* |
| UV irradiation at 30 W/m2 | 0.0523±0.0037 | 0.9670 | 1.3451±0.0879 | 0.9710 |
| High temperature at 65 ℃ | 0.1220±0.0114 | 0.9421 | 3.6310±0.2563 | 0.9663 |
| The combined action at 65 ℃+30 W/m2 | 0.2441±0.0304 | 0.9019 | 9.4673±0.8180 | 0.9503 |

**S5 Pearson correlation coefficients of MPs quantity reduction rate with their degradation efficiency under UV irradiation and high temperature exposure (n = 18)**

|  | <100 μm | 100-200 μm | 200-300 μm | 300-400 μm | 400-500 μm |
| --- | --- | --- | --- | --- | --- |
| UV irradiation | -0.237  (0.848) | 0.449  (0.704) | 0.932  (0.236) | -0.218  (0.860) | 0.668  (0.535) |
| High temperature exposure | -0.997*  (0.046) | -0.807*  (0.402) | -0.202  (0.871) | -0.999*  (0.033) | -0.623  (0.571) |

Note: * means significantly correlated at the 0.05 level.

**S6 the corresponding between fluorescent substances and fluorescent regions (EX/EM)**

| Fluorescent substances | EX excitation wavelength/nm | EM emission wavelength/nm |
| --- | --- | --- |
| λEX (nm) | λEM (nm) |
| Fulvic acid-like components | 240-290 | 370-440 |
| Humic acid-like components | 350-440 | 430-510 |
| Protein-like components | 250-280 | 300-380 |

**S7 Pearson correlation coefficients between reduction rate of protein-like components fluorescence intensity and MPs degradation efficiency (n = 36)**

|  | Fulvic acid-like components | Humic acid-like components | Protein-like components |
| --- | --- | --- | --- |
| MPs degradation | -0.018  (0.973) | -0.290  (0.577) | 0.484  (0.331) |
